# Supplementary material for: Membrane Vesicles Released by a hypervesiculating Escherichia coli Nissle 1917 tolR Mutant Are Highly Heterogeneous and Show Reduced Capacity for Epithelial Cell Interaction and Entry
Source: PubMed Central journal article supplement (PMC5201253; doi:10.1371/journal.pone.0169186), 2016-12-30

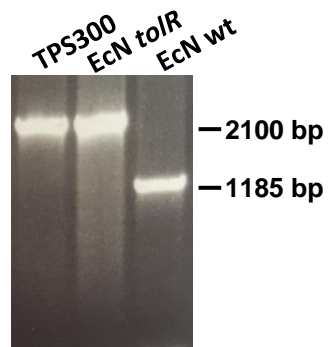

Supplement: pone.0169186.s001.pdf [file pone.0169186.s001.pdf]
